# Supplementary material
Source: PubMed Central journal article supplement (PMC5937138)
Supplement: NIHMS960808-supplement-Supplemental-file.pdf [file NIHMS960808-supplement-Supplemental-file.pdf]

# Supporting information for manuscript titled “Mechanistic Insights into R776H Mediated Activation of Epidermal Growth Factor Receptor (EGFR) Kinase”

Zheng Ruan<sup>†,‡</sup> and Natarajan Kannan<sup>\*,†</sup>

*Department of Biochemistry & Molecular Biology, University of Georgia, Athens, GA,  
USA, and Institute of Bioinformatics, University of Georgia, Athens, GA, USA*

E-mail: kannan@bmb.uga.edu

## Supporting Information

Supporting Information Available: Figure S1, Figure S2, Figure S3, Figure S4, Figure S5, Figure S6, Table S1, Table S2. This material is available free of charge via the Internet at <http://pubs.acs.org>.

---

\*To whom correspondence should be addressed

<sup>†</sup>Department of Biochemistry & Molecular Biology, University of Georgia, Athens, GA, USA

<sup>‡</sup>Institute of Bioinformatics, University of Georgia, Athens, GA, USA

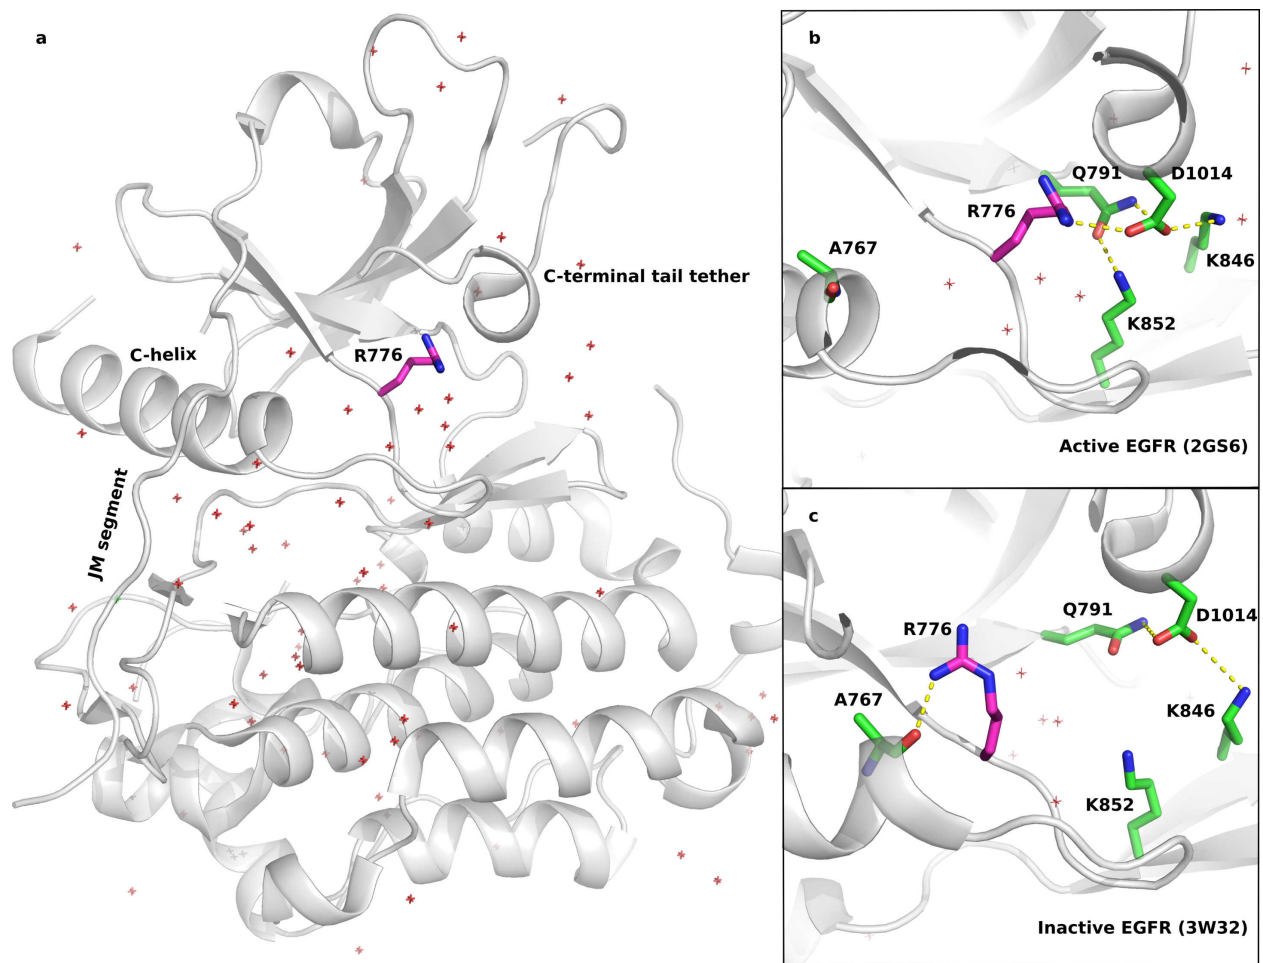

Figure S1: Structure of EGFR showing the position of R776 and associated interactions in active (2GS6) and inactive (3W32) states.

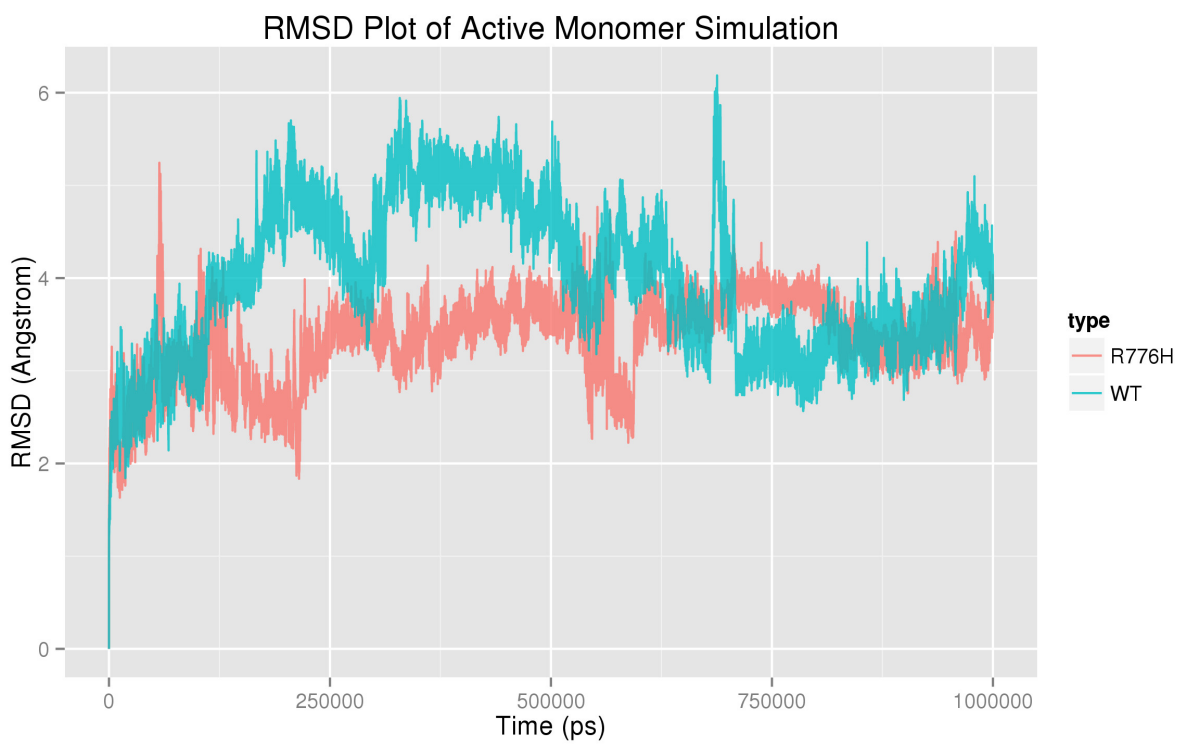

Figure S2: RMSD plot of active monomer simulation of WT (cyan) and R776H (red).

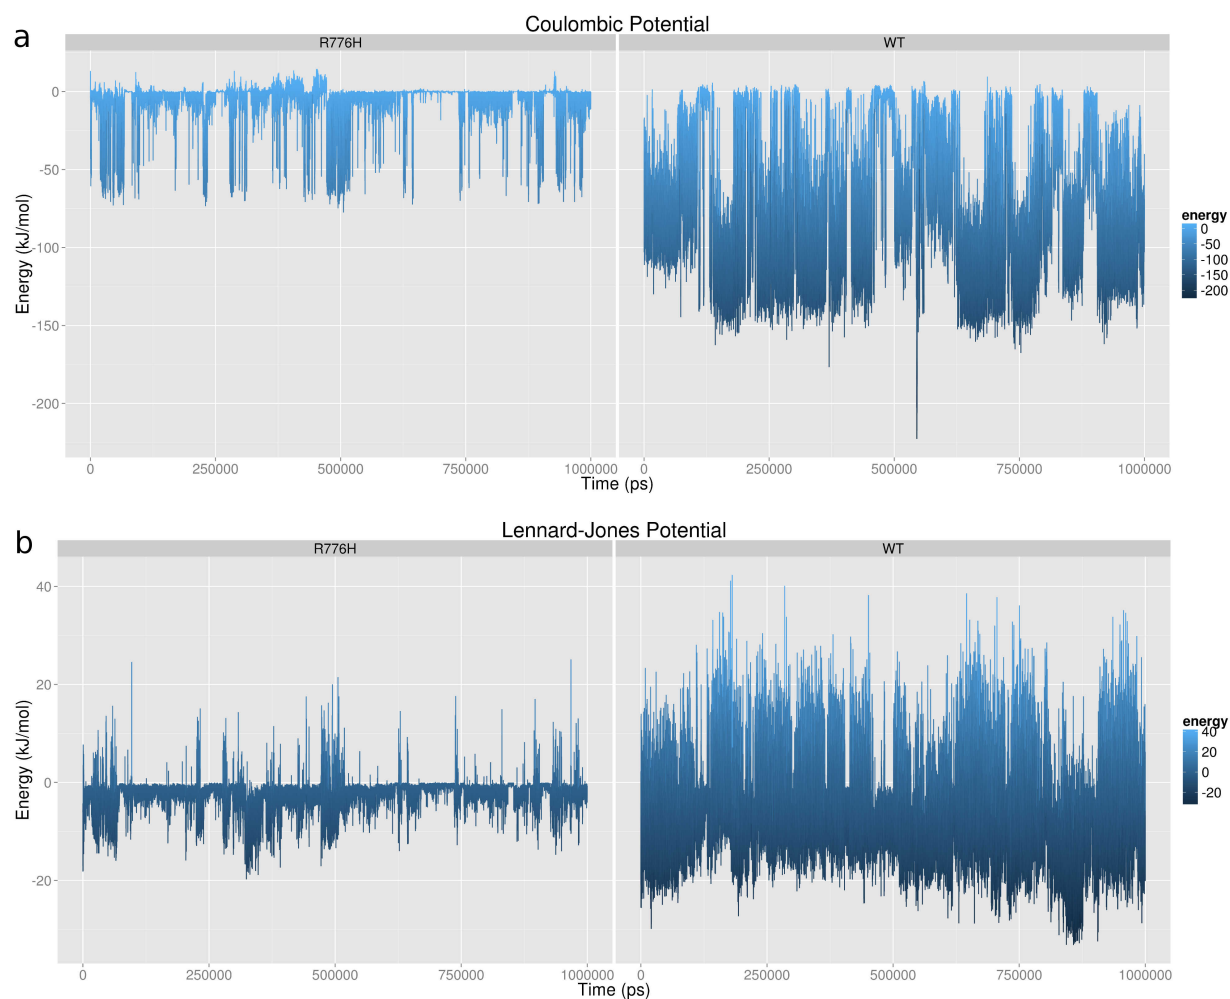

Figure S3: R776H loses the interaction with C-terminal tail of EGFR. a) Coulombic interaction energy profile between R776/H776 and the C-terminal tail tether. b) Van Der Waals interaction energy profile between R776/H776 and the C-terminal tail tether.

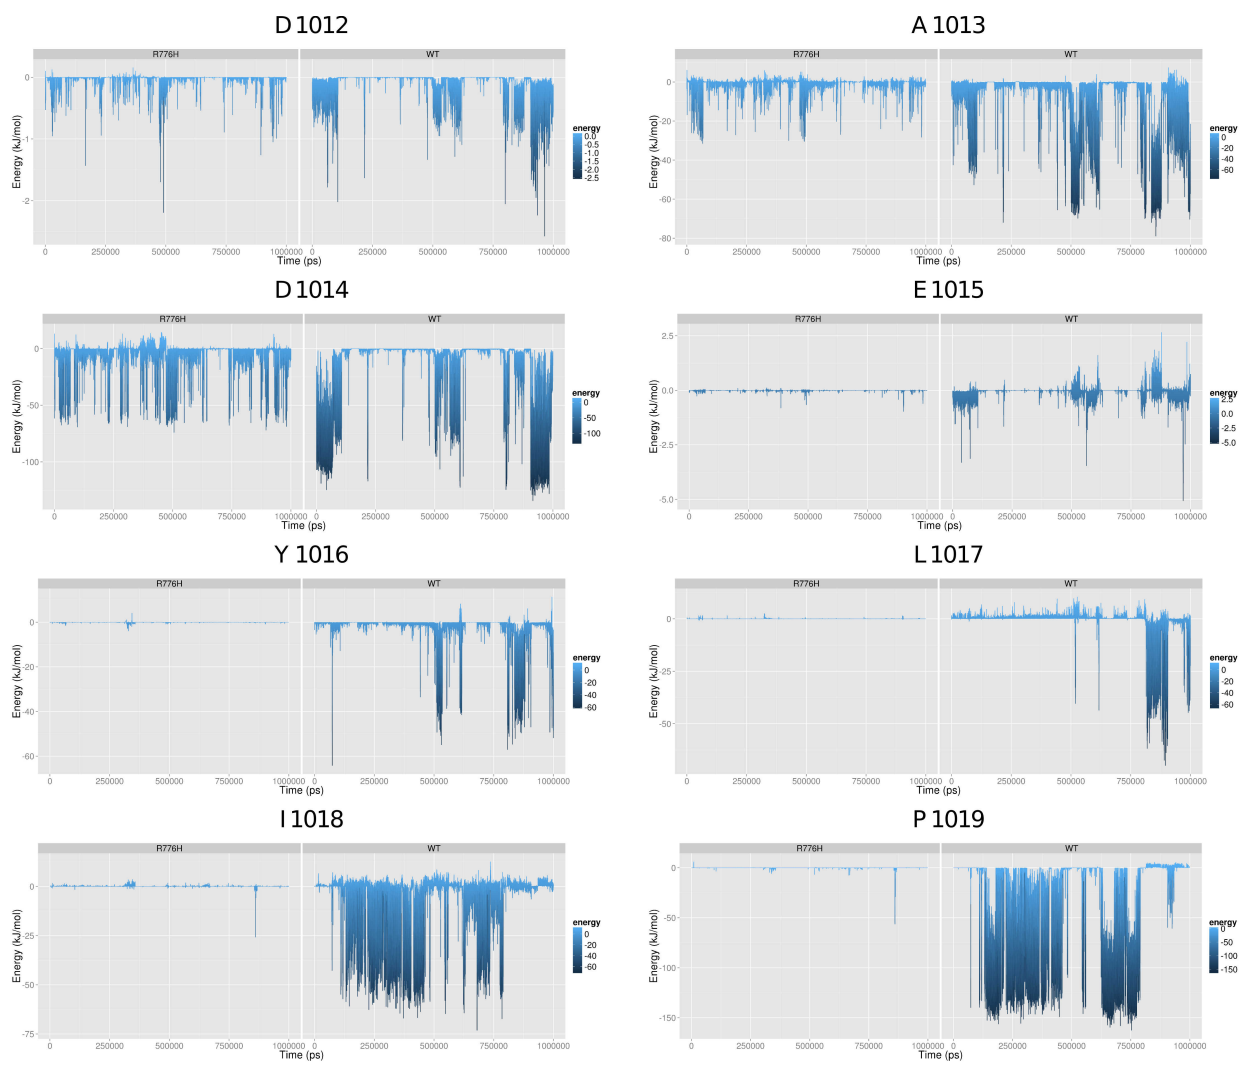

Figure S4: Coulombic interaction between R776/H776 to residues in C-terminal tail tether (D1012, A1013, D1014, E1015, Y1016, L1017, I1018, P1019)

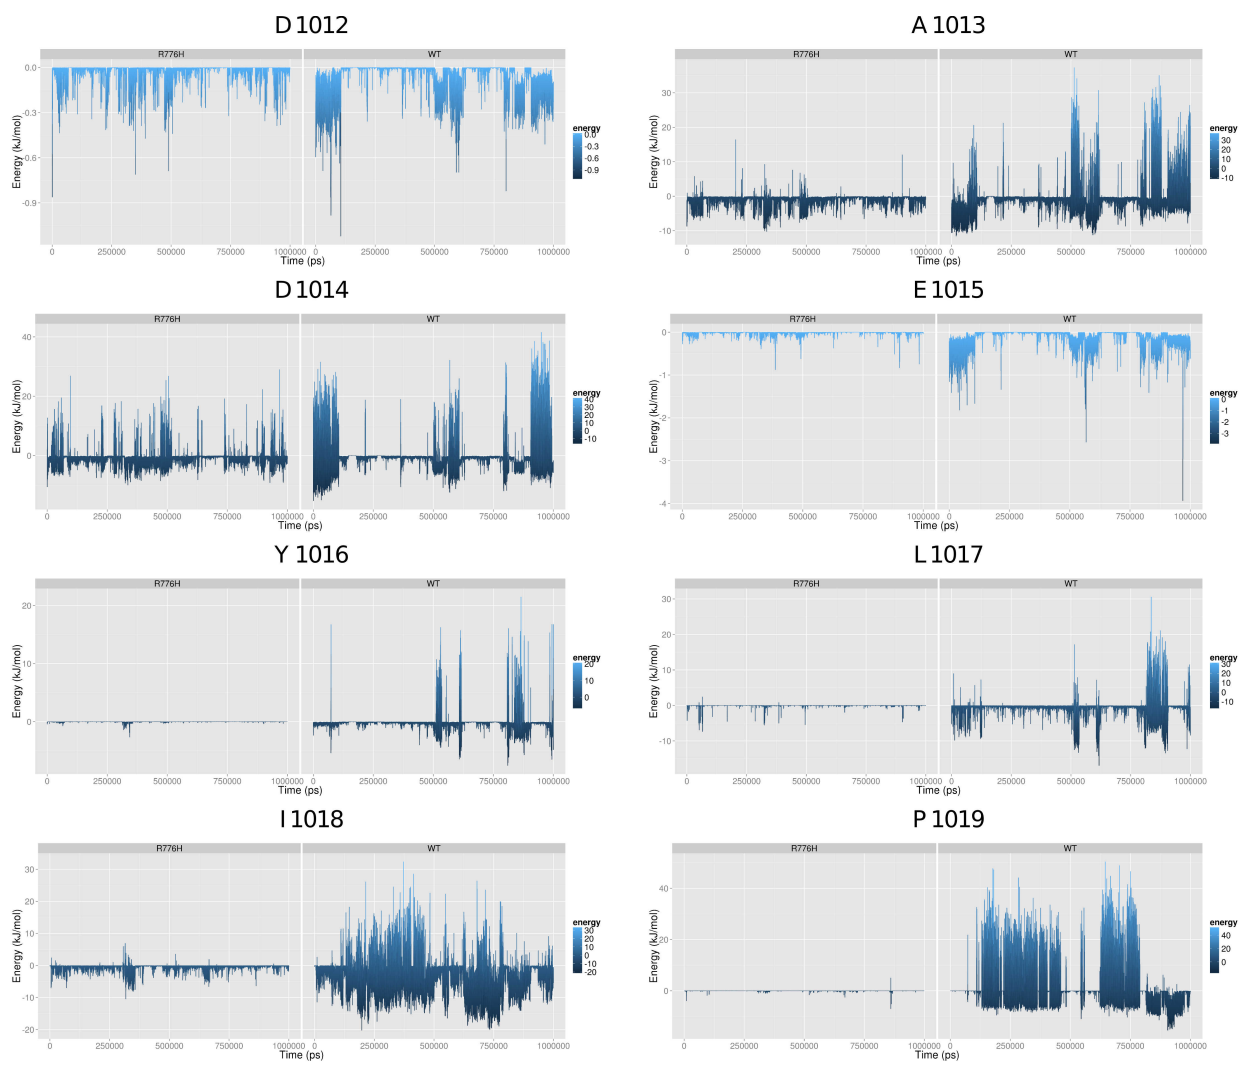

Figure S5: Van Der Waals interaction between R776/H776 to residues in C-terminal tail tether (D1012, A1013, D1014, E1015, Y1016, L1017, I1018, P1019)

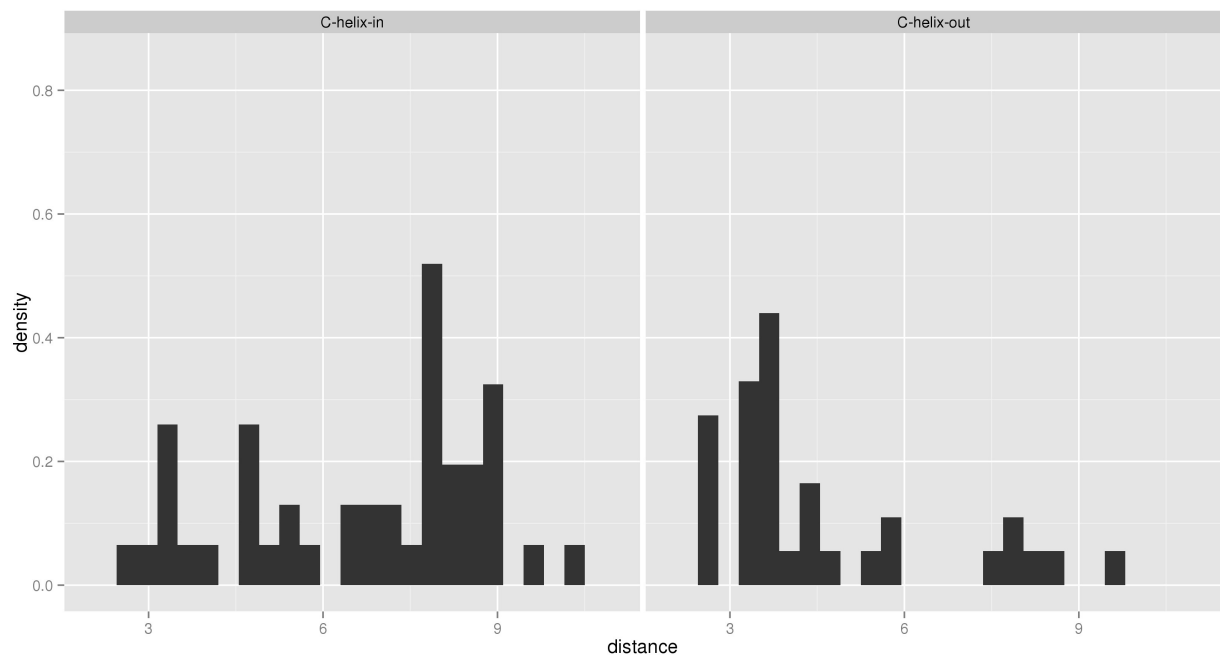

Figure S6: Histogram plot showing the shortest distances between R776(NE,NH1,NH2) to A767(O) between  $\alpha$ C-helix “in” crystal structures and  $\alpha$ C-helix “out” crystal structures. The list of crystal structures and distances considered in this plot are in Table S1.

**Table S1.** List of crystal structures considered in Figure S6.  $\alpha$ C-helix “in” and “out” are classified manually based on the structural alignment with 2GS6(“in”) and 1XKK(“out”).

**Table S2.** Cancer mutations in the equivalent position of R776 in EGFR of other kinases.  
Data Source: COSMIC database.
